# Supplementary material
Source: PubMed Central journal article supplement (PMC5700298)
Supplement: AAC.01288-17_zac012176731s1.pdf [file AAC.01288-17_zac012176731s1.pdf]

## Supplementary figures

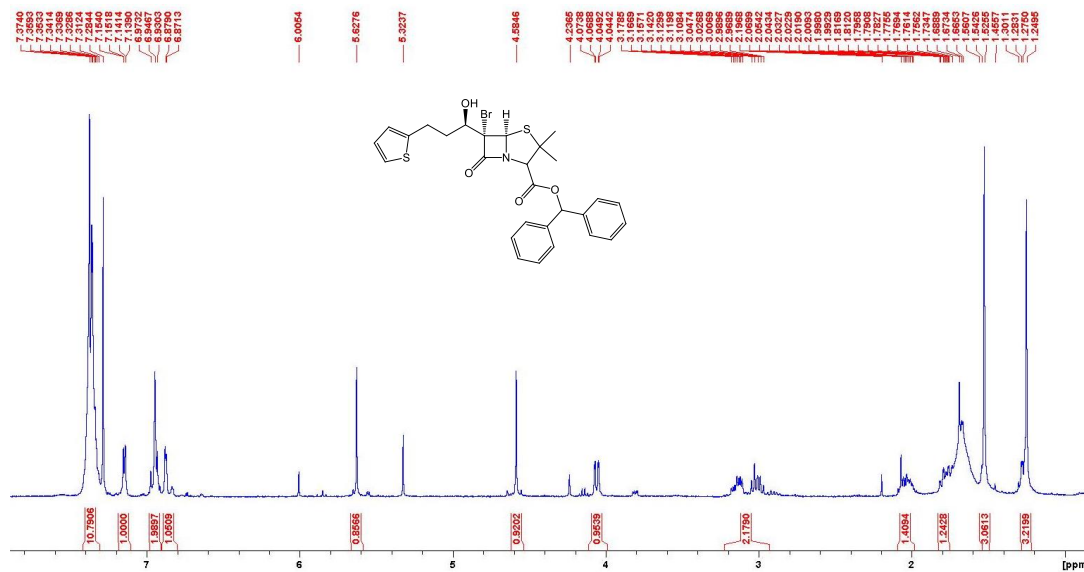

**Figure S1.**  $^1\text{H}$  NMR spectrum of **2a** ( $\text{CDCl}_3$ , 400MHz)

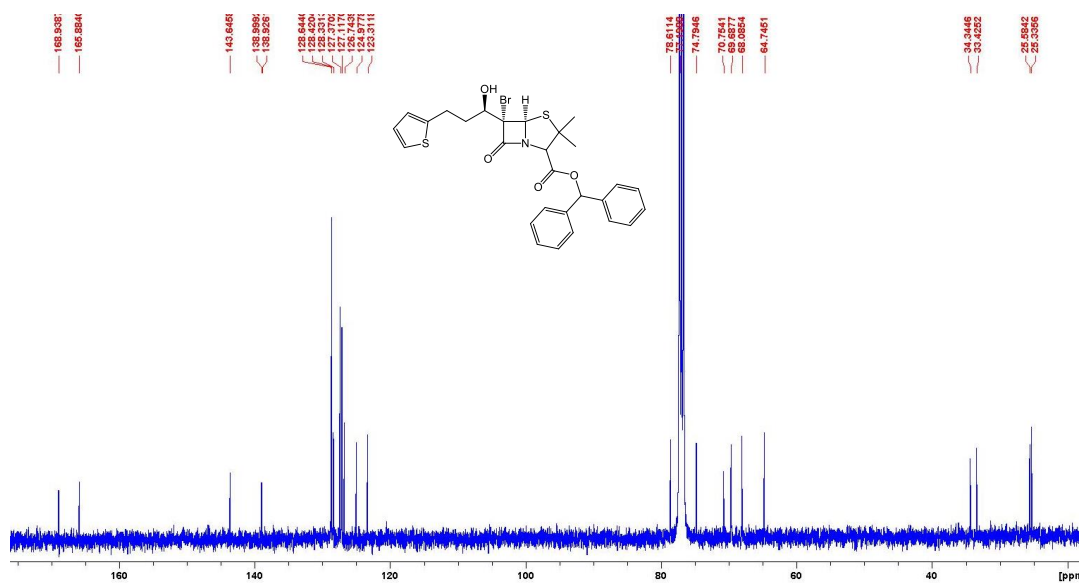

**Figure S2.**  $^{13}\text{C}$  NMR spectrum of **2a** ( $\text{CDCl}_3$ , 400MHz)

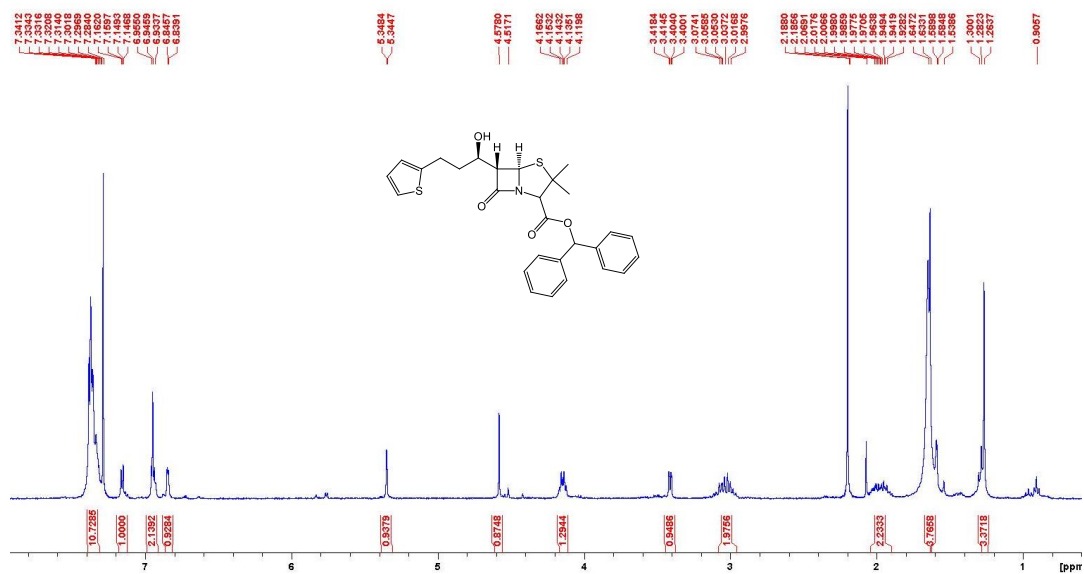

**Figure S3. <sup>1</sup>H NMR spectrum of 3 (CDCl<sub>3</sub>, 400MHz)**

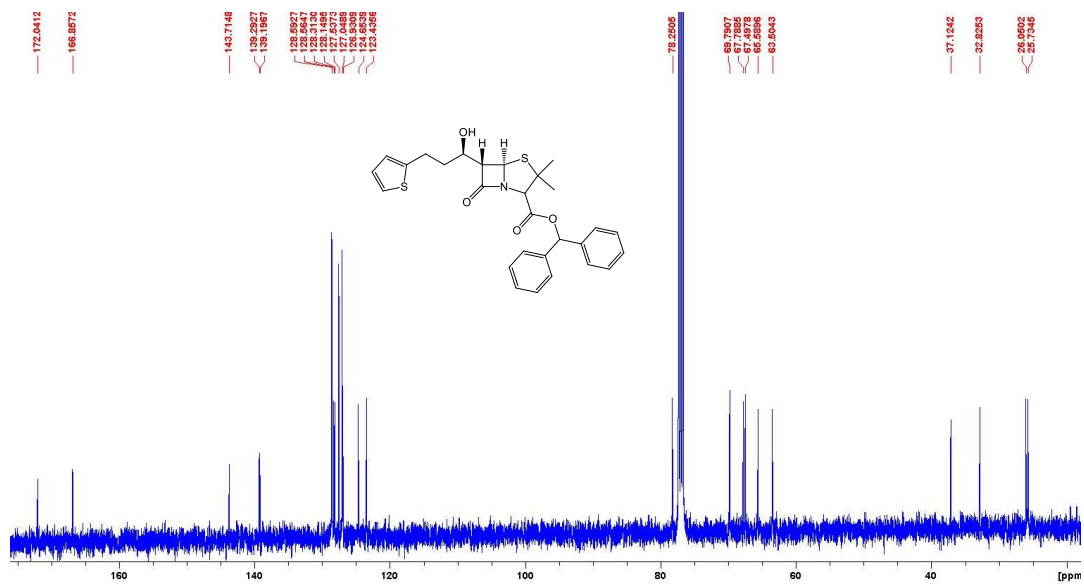

**Figure S4. <sup>13</sup>C NMR spectrum of 3 (CDCl<sub>3</sub>, 400MHz)**

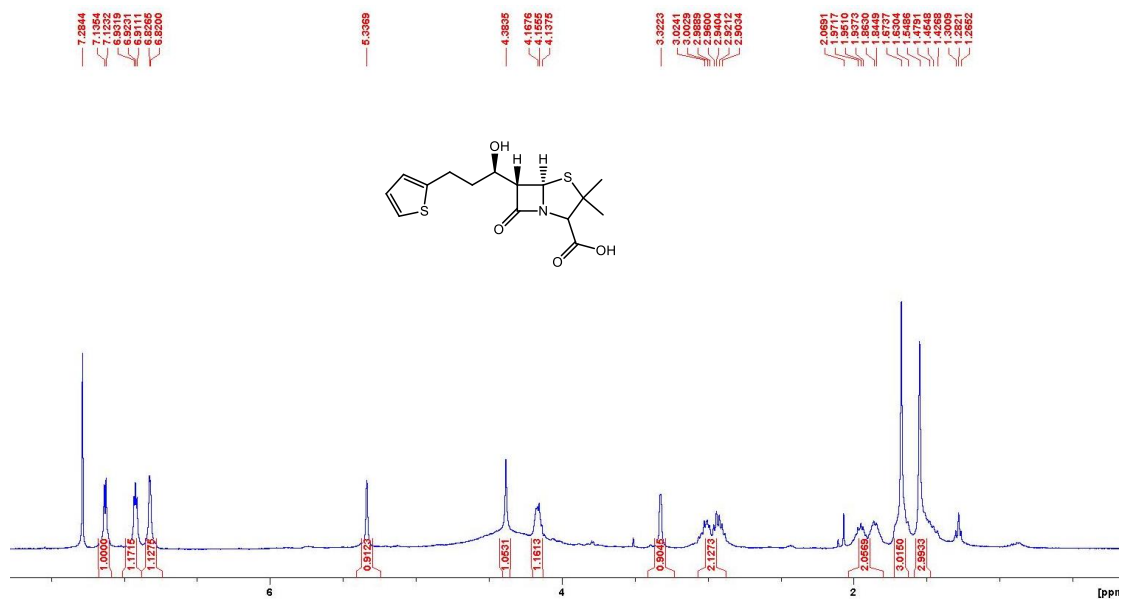

Figure S5. <sup>1</sup>H NMR spectrum of 4 (CDCl<sub>3</sub>, 400MHz)

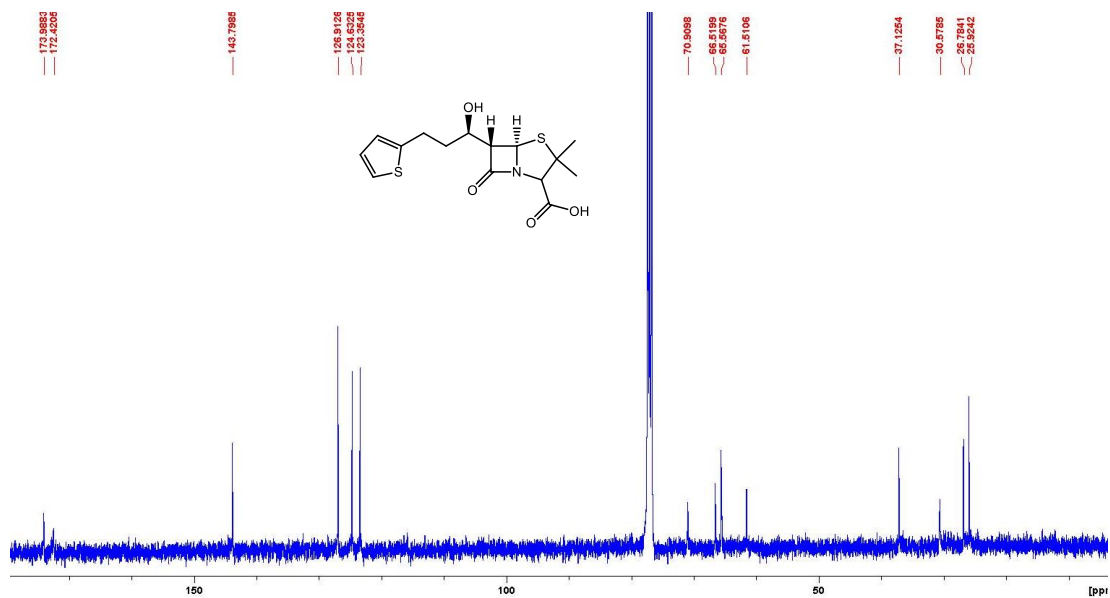

Figure S6. <sup>13</sup>C NMR spectrum of 4 (CDCl<sub>3</sub>, 400MHz)

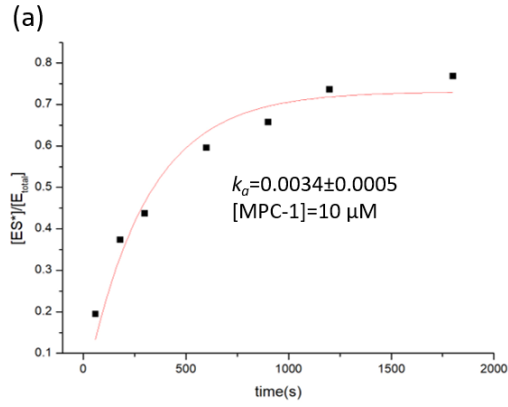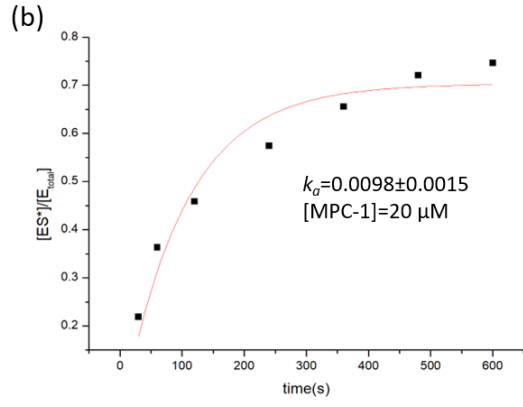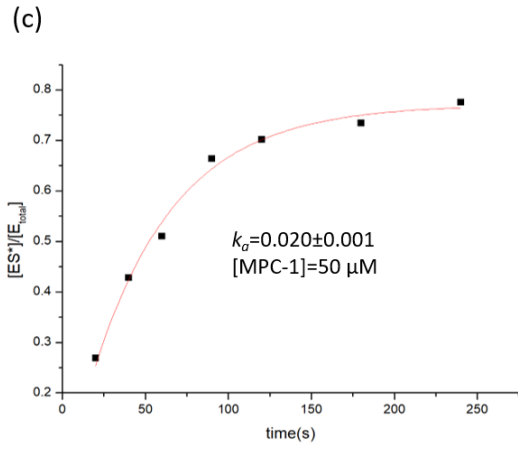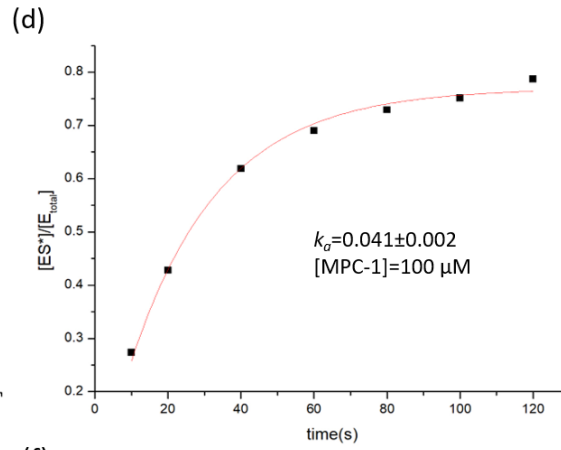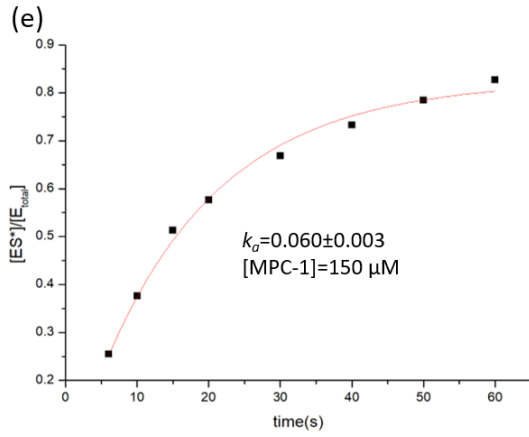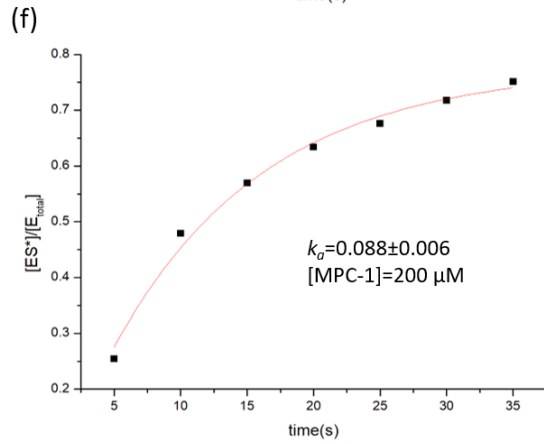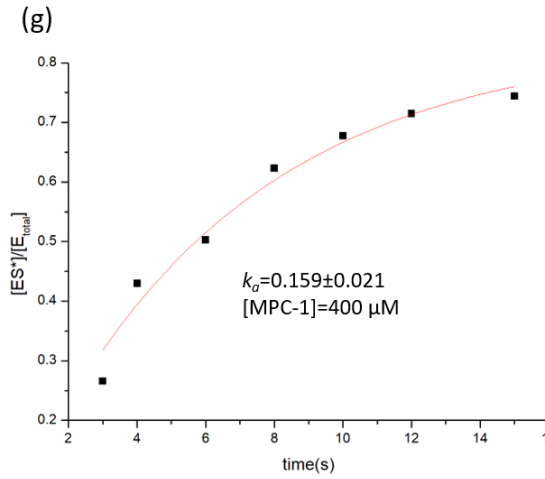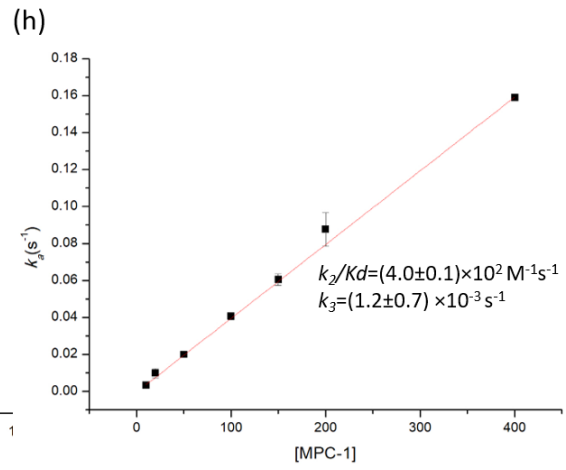

**Figure S7.** Kinetic studies of the interaction between P99 and MPC-1 with time-resolved ESI-MS. (a-g) Time course of the reaction of P99 with different concentrations of MPC-1.  $k_a$  for each plot is derived by fitting the value of  $[EI^*]/[E_{total}]$  versus time to equation 2. (h) Plot of the  $k_a$  values as a function of MPC-1 concentration.  $k_2/K_d$  and  $k_3$  values were obtained by fitting the value of  $k_a$  versus  $[I]$  to equation 3.
